# Supplementary material for: The Impact of Frailty and Geriatric Syndromes on the Quality of Life of Older Adults Receiving Home-Based Healthcare: A Cross-Sectional Survey
Source: MDPI journal article supplement (doi:10.3390/healthcare11010082), 2022-12-27
Supplement: s1 [file s1]

**Table S1.** The effect of frailty, geriatric syndromes, and other social demographic factors on Physical Health (QoL).

| Linear regression models                  |                    |               |         |                       |              |         |                       |              |         |
|-------------------------------------------|--------------------|---------------|---------|-----------------------|--------------|---------|-----------------------|--------------|---------|
|                                           | Univariable models |               |         | Multivariable model 1 |              |         | Multivariable model 2 |              |         |
|                                           | $\beta$ (SE)       | 95% CI        | p-value | $\beta$ (SE)          | 95% CI       | p-value | $\beta$ (SE)          | 95% CI       | p-value |
| <b>Frailty</b>                            |                    |               |         |                       |              |         |                       |              |         |
| Pre frail vs Non-frail                    | -1.93 (0.40)       | -2.73, -1.13  | <0.001  | -1.37 (0.36)          | -2.09, -0.64 | <0.001  | -1.34 (0.38)          | -2.10, -0.58 | 0.001   |
| Frail vs Non-frail                        | -3.92 (0.41)       | -4.74, -3.11  | <0.001  | -2.35 (0.41)          | -3.16, -1.54 | <0.001  | -2.31 (0.43)          | -3.17, -1.45 | <0.001  |
| <b>Cognitive function<sup>a</sup></b>     |                    |               |         |                       |              |         |                       |              |         |
| (Moca)                                    |                    |               |         |                       |              |         |                       |              |         |
| Dysfunction vs Normal (<26 vs $\geq 26$ ) | -2.16 (0.48)       | -3.11, -1.21  | <0.001  | -0.45 (0.39)          | -1.23, 0.32  | 0.248   | -0.44 (0.41)          | -1.26, 0.37  | 0.289   |
| <b>Depression (GDS)</b>                   |                    |               |         |                       |              |         |                       |              |         |
| Mild vs Normal                            | -1.87 (0.30)       | -2.47, -1.27  | <0.001  | -0.95 (0.28)          | -1.50, -0.38 | 0.001   | -1.00 (0.29)          | -1.58, -0.42 | 0.001   |
| Severe vs Normal                          | -3.80 (0.42)       | -4.64, -2.97  | <0.001  | -2.46 (0.39)          | -3.23, -1.69 | <0.001  | -2.47 (0.41)          | -3.29, -1.66 | <0.001  |
| <b>Comorbidity<sup>b</sup> (CCI)</b>      |                    |               |         |                       |              |         |                       |              |         |
| Severe (CCI $\geq 5$ ) vs Mild            | -0.76 (0.35)       | -1.45, -0.075 | 0.030   | -1.71 (0.26)          | -0.69, 0.35  | 0.519   | -0.08 (0.31)          | -0.69, 0.53  | 0.793   |
| <b>Disability in ADL<sup>c</sup></b>      |                    |               |         |                       |              |         |                       |              |         |
| (Barthel)                                 |                    |               |         |                       |              |         |                       |              |         |
| Semi-dependent vs Independent             | -1.95 (0.54)       | -3.02, -0.87  | <0.001  | 0.07 (0.45)           | -0.82, 0.98  | 0.868   | -0.02 (0.47)          | -0.96, 0.91  | 0.968   |
| Dependent vs Independent                  | -2.99 (0.59)       | -4.15, -1.82  | <0.001  | -0.40 (0.53)          | -1.46, 0.65  | 0.452   | -0.49 (0.55)          | -1.58, 0.59  | 0.370   |
| <b>Homebound status<sup>d</sup></b>       |                    |               |         |                       |              |         |                       |              |         |
| Semi-homebound vs Non-homebound           | -2.14 (0.38)       | -2.89, -1.38  | <0.001  | -0.84 (0.38)          | -1.59, -0.08 | 0.029   | -0.63 (0.40)          | -1.42, 0.15  | 0.115   |
| Homebound vs Non-homebound                | -3.53 (0.36)       | -4.25, -2.81  | <0.001  | -1.86 (0.38)          | -2.61, -1.09 | <0.001  | -1.58 (0.41)          | -2.40, -0.76 | <0.001  |
| <b>CVD<sup>*</sup></b>                    |                    |               |         |                       |              |         |                       |              |         |
| Yes vs No                                 | -0.51 (0.32)       | -1.15, 0.12   | 0.109   | -                     | -            | -       | -0.14 (0.29)          | -0.72, 0.43  | 0.624   |
| <b>Age (years)</b>                        |                    |               |         |                       |              |         |                       |              |         |
| $\geq 80$ vs <80                          | -1.12 (0.31)       | -1.74, -0.51  | <0.001  | -                     | -            | -       | -0.39 (0.27)          | -0.94, 0.15  | 0.154   |
| <b>Gender</b>                             |                    |               |         |                       |              |         |                       |              |         |
| Male vs Female                            | 0.87 (0.32)        | 0.23, 1.51    | 0.008   | -                     | -            | -       | -0.33 (0.30)          | -0.64, 0.57  | 0.915   |
| <b>Annual individual Income</b>           |                    |               |         |                       |              |         |                       |              |         |
| >4500 vs <4500                            | 0.49 (0.32)        | -0.14, 1.14   | 0.131   | -                     | -            | -       | -0.28 (0.25)          | -0.78, 0.23  | 0.278   |
| <b>Smoking</b>                            |                    |               |         |                       |              |         |                       |              |         |
| Current vs Never                          | -0.48 (0.56)       | -1.60, 0.62   | 0.388   | -                     | -            | -       | -0.46 (0.49)          | -1.43, 0.52  | 0.355   |
| Former vs Never                           | 0.84 (0.34)        | 0.15, 1.53    | 0.017   | -                     | -            | -       | 0.11 (0.31)           | -0.50, 0.72  | 0.718   |
| <b>Educational Level</b>                  |                    |               |         |                       |              |         |                       |              |         |
| Highschool vs Uneducated                  | 1.49 (0.48)        | 0.54, 2.45    | 0.002   | -                     | -            | -       | 0.26 (0.38)           | -0.49, 1.02  | 0.492   |
| Bachelor/MSc/PhD vs Uneducated            | 1.47 (0.63)        | 0.23, 2.71    | 0.020   | -                     | -            | -       | 0.46 (0.48)           | -0.49, 1.42  | 0.340   |

Notes: <sup>a</sup>Cognitive Function: MoCA<26 is indicative of cognitive dysfunction; <sup>b</sup>Comorbidity refers to the mean values of the CCI index and not to the actual number of illnesses; <sup>c</sup>Disability in ADL refers to performing Activities of Daily Living (ADL). Barthel  $\leq 10$  indicates that the person is dependent or “disabled”; <sup>d</sup>Homebound status refers to the ability of a person to leave home during the last month due to their illnesses. Homebound (able to leave home at least once a week in the last month); Semi-homebound: (able to get home about 2 times a week with help), Non-homebound: (about 2 times a week but without help). Abbreviations:  $\beta$ ’ unstandardized coefficients(SE): standard error; CI: Confidence Intervals. Physical Health (QoL) is controlled as a dependent variable in this linear model meaning. Example: In the relation “Frail vs. non-frail” it is expected reduction of Overall QoL score (-4.34 grades), this also means that lower scores as worse Overall QoL. \*CVD: Cardiovascular diseases.

**Table S2.** The effect of frailty, geriatric syndromes, and other social demographic factors on Psychological Health (QoL).

|                                                   | Linear regression models |              |         |                       |              |         |                       |              |         |
|---------------------------------------------------|--------------------------|--------------|---------|-----------------------|--------------|---------|-----------------------|--------------|---------|
|                                                   | Univariable models       |              |         | Multivariable model 1 |              |         | Multivariable model 2 |              |         |
|                                                   | $\beta$ (SE)             | 95% CI       | p-value | $\beta$ (SE)          | 95% CI       | p-value | $\beta$ (SE)          | 95% CI       | p-value |
| <b>Frailty</b>                                    |                          |              |         |                       |              |         |                       |              |         |
| Pre frail vs Non-frail                            | −0.84 (0.49)             | −1.80, 0.12  | 0.087   | −0.18 (0.44)          | −1.07, 0.70  | 0.685   | −0.23 (0.34)          | −1.17, 0.70  | 0.627   |
| Frail vs Non-frail                                | −3.31 (0.50)             | −4.30, −2.32 | <0.001  | −1.76 (0.50)          | −2.75, −0.77 | 0.001   | −1.74 (0.54)          | −2.81, −0.68 | 0.001   |
| <b>Cognitive function<sup>a</sup></b><br>(Moca)   |                          |              |         |                       |              |         |                       |              |         |
| Dysfunction vs Normal (<26 vs ≥26)                | −2.47 (0.55)             | −3.56, −1.39 | <0.001  | −1.02 (0.48)          | −1.97, −0.06 | 0.037   | −0.88 (0.51)          | −1.89, 0.12  | 0.087   |
| <b>Depression (GDS)</b>                           |                          |              |         |                       |              |         |                       |              |         |
| Mild vs Normal                                    | −2.41 (0.34)             | −3.09, −1.74 | <0.001  | −1.48 (0.34)          | −2.17, −0.80 | <0.001  | −1.47 (0.36)          | −2.19, −0.76 | <0.001  |
| Severe vs Normal                                  | −4.74 (0.47)             | −5.67, −3.80 | <0.001  | −3.57 (0.48)          | −4.51, −2.62 | <0.001  | −3.39 (0.51)          | −4.40, −2.38 | <0.001  |
| <b>Comorbidity<sup>b</sup> (CCI)</b>              |                          |              |         |                       |              |         |                       |              |         |
| Severe (CCI≥5) vs Mild                            | −0.76 (0.40)             | −1.55, 0.03  | 0.058   | −0.17 (0.32)          | −0.81, 0.46  | 0.589   | −0.05 (0.38)          | −0.80, 0.71  | 0.905   |
| <b>Disability in ADL<sup>c</sup></b><br>(Barthel) |                          |              |         |                       |              |         |                       |              |         |
| Semi-dependent vs Independent                     | −1.09 (0.65)             | −2.29, 0.25  | 0.117   | 0.79 (0.56)           | −0.31, 1.90  | 0.156   | 0.74 (0.58)           | −0.41, 1.90  | 0.206   |
| Dependent vs Independent                          | −2.04 (0.70)             | −3.42, −0.65 | 0.004   | 0.51 (0.65)           | −0.78, 1.81  | 0.435   | 0.50 (0.68)           | −0.83, 1.84  | 0.458   |
| <b>Homebound status<sup>d</sup></b>               |                          |              |         |                       |              |         |                       |              |         |
| Semi-homebound vs Non-homebound                   | −1.34 (0.46)             | −2.27, −0.42 | 0.004   | −0.12 (0.46)          | −1.05, 0.79  | 0.791   | −0.11 (0.49)          | −1.08, 0.86  | 0.831   |
| Homebound vs Non-homebound                        | −3.35 (0.44)             | −4.23, −2.48 | <0.001  | −1.43 (0.47)          | −2.36, −0.50 | 0.003   | −1.46 (0.51)          | −2.47, −0.45 | 0.005   |
| <b>CVD*</b>                                       |                          |              |         |                       |              |         |                       |              |         |
| Yes vs No                                         | −0.65 (0.37)             | −1.38, 0.08  | 0.080   | -                     | -            | -       | −0.19 (0.36)          | −0.90, 0.52  | 0.596   |
| <b>Age (years)</b>                                |                          |              |         |                       |              |         |                       |              |         |
| ≥80 vs <80                                        | −0.81 (0.36)             | −1.53, −0.09 | 0.028   | -                     | -            | -       | −0.22 (0.34)          | −0.90, 0.45  | 0.515   |
| <b>Gender</b>                                     |                          |              |         |                       |              |         |                       |              |         |
| Male vs Female                                    | 0.61 (0.38)              | −0.13, 1.36  | 0.107   | -                     | -            | -       | −0.13 (0.38)          | −0.89, 0.61  | 0.716   |
| <b>Annual individual Income</b>                   |                          |              |         |                       |              |         |                       |              |         |
| >4500 vs <4500                                    | 0.61 (0.37)              | −0.13, 1.34  | 0.104   | -                     | -            | -       | 0.06 (0.31)           | −0.56, 0.69  | 0.838   |
| <b>Smoking</b>                                    |                          |              |         |                       |              |         |                       |              |         |
| Current vs Never                                  | −0.58 (0.65)             | −1.87, 0.69  | 0.370   | -                     | -            | -       | −0.42 (0.61)          | −1.62, 0.78  | 0.494   |
| Former vs Never                                   | 0.78 (0.40)              | −0.01, 1.58  | 0.053   | -                     | -            | -       | 0.21 (0.38)           | −0.54, 0.97  | 0.583   |
| <b>Educational Level</b>                          |                          |              |         |                       |              |         |                       |              |         |
| Highschool vs Uneducated                          | 0.77 (0.56)              | −0.34, 1.88  | 0.173   | -                     | -            | -       | 0.26 (0.38)           | −0.49, 1.02  | 0.492   |
| Bachelor/MSc/PhD vs Uneducated                    | 1.13 (0.73)              | −0.32, 2.58  | 0.126   | -                     | -            | -       | 0.46 (0.48)           | −0.49, 1.42  | 0.340   |

Notes: <sup>a</sup>Cognitive Function: MoCA<26 is indicative of cognitive dysfunction; <sup>b</sup>Comorbidity refers to the mean values of the CCI index and not to the actual number of illnesses; <sup>c</sup>Disability in ADL refers to performing Activities of Daily Living (ADL). Barthel ≤10 indicates that the person is dependent or “disabled”; <sup>d</sup>Homebound status refers to the ability of a person to leave home during the last month due to their illnesses. Homebound (able to leave home at least once a week in the last month); Semi-homebound: (able to get home about 2 times a week with help), Non-homebound: (about 2 times a week but without help). Abbreviations:  $\beta$ : unstandardized coefficients(SE): standard error; CI: Confidence Intervals. Psychological Health (QoL) is controlled as a dependent variable in this linear model meaning. Example: In the relation “Frail vs. non-frail” it is expected reduction of Overall QoL score (−4.34 grades), this also means that lower scores as worse Overall QoL. \*CVD: Cardiovascular diseases.

**Table S3.** The effect of frailty, geriatric syndromes, and other social demographic factors on Social Relationships (QoL).

| Linear regression models                          |                    |              |         |                       |              |         |                       |              |         |
|---------------------------------------------------|--------------------|--------------|---------|-----------------------|--------------|---------|-----------------------|--------------|---------|
|                                                   | Univariable models |              |         | Multivariable model 1 |              |         | Multivariable model 2 |              |         |
|                                                   | $\beta$ (SE)       | 95% CI       | p-value | $\beta$ (SE)          | 95% CI       | p-value | $\beta$ (SE)          | 95% CI       | p-value |
| <b>Frailty</b>                                    |                    |              |         |                       |              |         |                       |              |         |
| Pre frail vs Non-frail                            | −1.36 (0.48)       | −2.32, −0.40 | 0.005   | −0.61 (0.46)          | −1.52, 0.31  | 0.193   | −0.42 (0.48)          | −1.38, 0.53  | 0.385   |
| Frail vs Non-frail                                | −3.67 (0.49)       | −4.65, −2.69 | <0.001  | −1.98 (0.51)          | −3.01, −0.96 | <0.001  | −1.86 (0.55)          | −2.93, −0.77 | 0.001   |
| <b>Cognitive function<sup>a</sup></b><br>(Moca)   |                    |              |         |                       |              |         |                       |              |         |
| Dysfunction vs Normal (<26 vs ≥26)                | −2.51 (0.54)       | −3.57, −1.45 | <0.001  | −1.36 (0.49)          | −2.34, −0.38 | 0.007   | −1.25 (0.52)          | −2.28, −0.22 | 0.017   |
| <b>Depression (GDS)</b>                           |                    |              |         |                       |              |         |                       |              |         |
| Mild vs Normal                                    | −2.67 (0.34)       | −3.35, −1.98 | <0.001  | −1.96 (0.35)          | −2.67, −1.25 | <0.001  | −2.02 (0.36)          | −2.74, −1.29 | <0.001  |
| Severe vs Normal                                  | −3.58 (0.48)       | −4.53, −2.63 | <0.001  | −2.57 (0.49)          | −3.54, −1.59 | <0.001  | −2.46 (0.52)          | −3.49, −1.43 | <0.001  |
| <b>Comorbidity<sup>b</sup> (CCI)</b>              |                    |              |         |                       |              |         |                       |              |         |
| Severe (CCI≥5) vs Mild                            | −0.42 (0.40)       | −1.21, 0.37  | 0.297   | 0.32 (0.33)           | −0.33, 0.98  | 0.331   | 0.60 (0.39)           | −0.17, 1.37  | 0.126   |
| <b>Disability in ADL<sup>c</sup></b><br>(Barthel) |                    |              |         |                       |              |         |                       |              |         |
| Semi-dependent vs Independent                     | −1.66 (0.64)       | −2.92, −0.39 | 0.010   | 0.17 (0.57)           | −0.96, 1.31  | 0.761   | 0.04 (0.59)           | −1.13, 1.22  | 0.940   |
| Dependent vs Independent                          | −2.33 (0.69)       | −3.67, −0.95 | 0.001   | −0.47 (0.67)          | −1.81, 0.86  | 0.487   | −0.54 (0.69)          | −1.90, 0.82  | 0.432   |
| <b>Homebound status<sup>d</sup></b>               |                    |              |         |                       |              |         |                       |              |         |
| Semi-homebound vs Non-homebound                   | −1.63 (0.46)       | −2.56, −0.71 | 0.001   | −0.12 (0.48)          | −1.08, 0.83  | 0.801   | 0.08 (0.50)           | −0.90, 1.08  | 0.863   |
| Homebound vs Non-homebound                        | −2.76 (0.44)       | −3.64, −1.88 | <0.001  | −0.96 (0.49)          | −1.93, −0.01 | 0.48    | −0.61 (0.52)          | −1.64, 0.42  | 0.242   |
| <b>CVD*</b>                                       |                    |              |         |                       |              |         |                       |              |         |
| Yes vs No                                         | −0.42 (0.36)       | −1.14, 0.29  | 0.248   | -                     | -            | -       | −0.46 (0.36)          | −1.18, 0.27  | 0.219   |
| <b>Age (years)</b>                                |                    |              |         |                       |              |         |                       |              |         |
| ≥80 vs <80                                        | −0.94 (0.35)       | −1.64, −0.23 | 0.009   | -                     | -            | -       | −0.61 (0.35)          | −1.30, 0.076 | 0.081   |
| <b>Gender</b>                                     |                    |              |         |                       |              |         |                       |              |         |
| Male vs Female                                    | 1.14 (0.36)        | 0.42, 1.87   | 0.002   | -                     | -            | -       | 0.68 (0.38)           | −0.08, 1.44  | 0.080   |
| <b>Annual individual Income</b>                   |                    |              |         |                       |              |         |                       |              |         |
| >4500 vs <4500                                    | 0.39 (0.37)        | −0.33, 1.13  | 0.282   | -                     | -            | -       | −0.32 (0.33)          | −0.95, 0.31  | 0.320   |
| <b>Smoking</b>                                    |                    |              |         |                       |              |         |                       |              |         |
| Current vs Never                                  | −0.71 (0.64)       | −1.96, 0.56  | 0.275   | -                     | -            | -       | −0.90 (0.62)          | −2.13, 0.32  | 0.147   |
| Former vs Never                                   | 0.67 (0.39)        | −0.11, 1.45  | 0.091   | -                     | -            | -       | −0.32 (0.39)          | −1.09, 0.45  | 0.412   |
| <b>Educational Level</b>                          |                    |              |         |                       |              |         |                       |              |         |
| Highschool vs Uneducated                          | 0.97 (0.55)        | −0.11, 2.06  | 0.079   | -                     | -            | -       | −0.14 (0.48)          | −1.09, 0.80  | 0.761   |
| Bachelor/MSc/PhD vs Uneducated                    | 1.58 (0.72)        | 0.16, 2.99   | 0.029   | -                     | -            | -       | 0.87 (0.61)           | −0.32, 2.07  | 0.153   |

Notes: <sup>a</sup>Cognitive Function: MoCA<26 is indicative of cognitive dysfunction; <sup>b</sup>Comorbidity refers to the mean values of the CCI index and not to the actual number of illnesses; <sup>c</sup>Disability in ADL refers to performing Activities of Daily Living (ADL). Barthel ≤10 indicates that the person is dependent or “disabled”; <sup>d</sup>Homebound status refers to the ability of a person to leave home during the last month due to their illnesses. Homebound (able to leave home at least once a week in the last month); Semi-homebound: (able to get home about 2 times a week with help), Non-homebound: (about 2 times a week but without help). Abbreviations:  $\beta$ ' unstandardized coefficients(SE): standard error; CI: Confidence Intervals. Social Relationships (QoL) are controlled as a dependent variable in this linear model meaning. Example: In the relation “Frail vs. non-frail” it is expected reduction of Overall QoL score (−4.34 grades), this also means that lower scores as worse Overall QoL. \*CVD: Cardiovascular diseases.

**Table S4.** The effect of frailty, geriatric syndromes, and other social demographic factors on Environment (QoL).

|                                                   | Linear regression models |              |         |                       |              |         |                       |              |         |
|---------------------------------------------------|--------------------------|--------------|---------|-----------------------|--------------|---------|-----------------------|--------------|---------|
|                                                   | Univariable models       |              |         | Multivariable model 1 |              |         | Multivariable model 2 |              |         |
|                                                   | $\beta$ (SE)             | 95% CI       | p-value | $\beta$ (SE)          | 95% CI       | p-value | $\beta$ (SE)          | 95% CI       | p-value |
| <b>Frailty</b>                                    |                          |              |         |                       |              |         |                       |              |         |
| Pre frail vs Non-frail                            | −2.43 (0.42)             | −3.26, −1.60 | <0.001  | −1.87 (0.41)          | −2.67, −1.06 | <0.001  | −1.82 (0.42)          | −2.64, −0.99 | <0.001  |
| Frail vs Non-frail                                | −3.81 (0.43)             | −4.65, −2.96 | <0.001  | −2.58 (0.46)          | −3.47, −1.68 | <0.001  | −2.28 (0.47)          | −3.22, −1.35 | <0.001  |
| <b>Cognitive function<sup>a</sup></b><br>(Moca)   |                          |              |         |                       |              |         |                       |              |         |
| Dysfunction vs Normal (<26 vs ≥26)                | −2.27 (0.48)             | −3.21, −1.31 | <0.001  | −0.83 (0.44)          | −1.70, 0.03  | 0.060   | −0.92 (0.45)          | −1.81, −0.04 | 0.042   |
| <b>Depression (GDS)</b>                           |                          |              |         |                       |              |         |                       |              |         |
| Mild vs Normal                                    | −2.04 (0.32)             | −2.66, −1.41 | <0.001  | −1.25 (0.32)          | −1.88, −0.63 | <0.001  | −1.36 (0.32)          | −1.99, −0.74 | <0.001  |
| Severe vs Normal                                  | −3.25 (0.44)             | −4.12, −2.38 | <0.001  | −2.17 (0.43)          | −3.03, −1.31 | <0.001  | −2.17 (0.45)          | −3.05, −1.28 | <0.001  |
| <b>Comorbidity<sup>b</sup> (CCI)</b>              |                          |              |         |                       |              |         |                       |              |         |
| Severe (CCI≥5) vs Mild                            | −0.21 (0.35)             | −0.92, 0.49  | 0.547   | 0.36 (0.29)           | −0.21, 0.94  | 0.216   | 0.47 (0.33)           | −0.19, 1.14  | 0.161   |
| <b>Disability in ADL<sup>c</sup></b><br>(Barthel) |                          |              |         |                       |              |         |                       |              |         |
| Semi-dependent vs Independent                     | −1.85 (0.57)             | −2.97, −0.74 | 0.001   | −0.67 (0.51)          | −1.67, 0.34  | 0.192   | −0.65 (0.51)          | −1.67, 0.35  | 0.204   |
| Dependent vs Independent                          | −2.29 (0.61)             | −3.49, −1.08 | <0.001  | −0.73 (0.59)          | −1.91, 0.44  | 0.222   | −0.69 (0.59)          | −1.86, 0.48  | 0.248   |
| <b>Homebound status<sup>d</sup></b>               |                          |              |         |                       |              |         |                       |              |         |
| Semi-homebound vs Non-homebound                   | −0.95 (0.41)             | −1.77, −0.13 | 0.024   | 0.67 (0.42)           | −0.16, 1.52  | 0.113   | 0.77 (0.43)           | −0.08, 1.63  | 0.075   |
| Homebound vs Non-homebound                        | −2.79 (0.40)             | −3.58, −2.01 | <0.001  | −0.94 (0.43)          | −1.78, −0.09 | 0.030   | −0.59 (0.45)          | −1.48, 0.29  | 0.189   |
| <b>CVD*</b>                                       |                          |              |         |                       |              |         |                       |              |         |
| Yes vs No                                         | −0.57 (0.32)             | −1.21, 0.07  | 0.080   | -                     | -            | -       | −0.36 (0.31)          | −0.99, 0.26  | 0.253   |
| <b>Age (years)</b>                                |                          |              |         |                       |              |         |                       |              |         |
| ≥80 vs <80                                        | −0.23 (0.32)             | −0.87, 0.40  | 0.474   | -                     | -            | -       | 0.02 (0.30)           | −0.58, 0.61  | 0.953   |
| <b>Gender</b>                                     |                          |              |         |                       |              |         |                       |              |         |
| Male vs Female                                    | 1.05 (0.33)              | 0.39, 1.69   | 0.002   | -                     | -            | -       | −0.06 (0.33)          | −0.71, 0.59  | 0.860   |
| <b>Annual individual Income</b>                   |                          |              |         |                       |              |         |                       |              |         |
| >4500 vs <4500                                    | 1.41 (0.32)              | 0.77, 2.04   | <0.001  | -                     | -            | -       | 0.89 (0.27)           | 0.34, 1.44   | 0.002   |
| <b>Smoking</b>                                    |                          |              |         |                       |              |         |                       |              |         |
| Current vs Never                                  | −1.07 (0.56)             | −2.19, 0.04  | 0.058   | -                     | -            | -       | −0.74 (0.53)          | −1.79, 0.32  | 0.171   |
| Former vs Never                                   | 1.03 (0.35)              | 0.34, 1.72   | 0.003   | -                     | -            | -       | 0.45 (0.33)           | −0.21, 1.12  | 0.181   |
| <b>Educational Level</b>                          |                          |              |         |                       |              |         |                       |              |         |
| Highschool vs Uneducated                          | 0.87 (0.49)              | −0.10, 1.85  | 0.079   | -                     | -            | -       | 0.14 (0.41)           | −0.68, 0.96  | 0.739   |
| Bachelor/MSc/PhD vs Uneducated                    | 1.05 (0.65)              | −0.23, 2.32  | 0.107   | -                     | -            | -       | 0.41 (0.52)           | −0.62, 1.45  | 0.433   |

Notes: <sup>a</sup>Cognitive Function: MoCA<26 is indicative of cognitive dysfunction; <sup>b</sup>Comorbidity refers to the mean values of the CCI index and not to the actual number of illnesses; <sup>c</sup>Disability in ADL refers to performing Activities of Daily Living (ADL). Barthel ≤10 indicates that the person is dependent or “disabled”; <sup>d</sup>Homebound status refers to the ability of a person to leave home during the last month due to their illnesses. Homebound (able to leave home at least once a week in the last month); Semi-homebound: (able to get home about 2 times a week with help), Non-homebound: (about 2 times a week but without help). Abbreviations:  $\beta$ ’ unstandardized coefficients (SE): standard error; CI: Confidence Intervals. Environment (QoL) is controlled as a dependent variable in this linear model meaning. Example: In the relation “Frail vs. non-frail” it is expected reduction of Overall QoL score (−4.34 grades), this also means that lower scores as worse Overall QoL. \*CVD: Cardiovascular diseases.
